# Supplementary material
Source: publisher figshare collection journal article supplement (https://gsajournals.figshare.com/ndownloader/files/12367040)
Supplement: Supplementary file 1 [file 12367040]

**Table S2.** Summary statistics by population (G = German; I = Israel), clone, and trait (AM = Age at maturity; Egg = Egg number at maturity; Size = Body length at maturity; MaxV = Maximum velocity; MeanV = Mean velocity; SDV = Standard deviation of velocity); GOD = Generations of divergence; z0 = Initial mean phenotype; Rm = Per-generation change in mean phenotype; R2 = Coefficient of determination; F = F-statistic; df = Degrees of freedom; p-value = Unadjusted p-value; ΔM = Mutational bias; Vm = Mutational variance; Lower Vm = Mutational variance lower limit; Upper Vm = Mutational variance upper limit; CVm2 = Evolvability; Ve = Environmental variance; Lower Ve = Environmental variance lower limit; Upper Ve = Environmental variance upper limit.
